# Supplementary material for: Complete chloroplast genome sequence of Pachystachys lutea Nees: genome structure, adaptive evolution, and phylogenetic relationships
Source: Research Square preprint supplement (doi:10.21203/rs.3.rs-5848411/v1), 2025-04-17
Supplement: Supplementary file 3 [file 3abbebe8622674e12656a68c.xlsx]

## Sheet: kaks
Table S3. Ka/Ks values of PCGs of P. lutea with close species.
name	accD	atpA	atpB	atpE	atpF	atpH	atpI	ccsA	cemA	clpP	infA	matK	ndhA	ndhC	ndhD	ndhE	ndhG	ndhH	ndhI	ndhK	petA	petB	petD	petG	petN	psaA	psaB	psaC	psaJ	psbB	psbC	psbD	psbE	psbF	psbH	psbI	psbJ	psbK	psbL	psbM	psbN	psbT	rbcL	rpl14	rpl16	rpl20	rpl22	rpl33	rpl36
Dicliptera peruviana	0.2991	0.0766	0.0712	0.2154	0.1769	0	0.2146	0.2519	0.3607	0.6127	0.0384	0.295	0.1955	0.0726	0.1746	0.3465	0.2235	0.0847	0.1645	0.2523	0.8844	0.029	2.8351	0	0	0.0277	0	0	0	0.0285	0.0244	0.0117	0.3136	0	0	0	0	0	0	0	0	0.308	0.1162	0.0941	0.2405	0.097	0.3676	0.5282	0
Dicliptera mucronata	0.2886	0.0766	0.0712	0.2154	0.1769	0	0.2146	0.2519	0.3612	0.6127	0.0384	0.295	0.1623	0.0726	0.1838	0.3465	0.2568	0.0847	0.1645	0.2523	0.8844	0.0321	2.8351	0	0	0.0277	0	0	0	0.0285	0.0254	0.0123	0.1545	0	0	0	0	0	0	0	0	0.308	0.1162	0.07	0.2405	0.097	0.3676	0.5282	0
Strobilanthes cusia	0.5513	0.169	0.0308	0.6807	0.2288	0	0.1535	0.5267	0.2181	0.12	0	0.604	0.2442	0.1124	0.194	0.3673	0.2692	0.0992	0.2446	0.0459	0.3516	0.0517	0	0	0	0.0505	0.0294	0	0	0.0825	0.0484	0.0125	0	0	0.0912	0.0464	0.7165	0.3955	0.285	0.3187	0.1654	0.0963	0.0913	0.1732	0.0938	0.7455	0.5017	0.4554	0.1373
Clinacanthus nutans	0.6023	0	0	0	0.1628	0	0.2057	0.3632	0.5421	0	0.1447	0.2899	0.167	0	0.0752	0.0964	0.1543	0.0936	0	0	0.1526	0.3307	0	0	0	0.1059	0.0674	0	0	0.0552	0.039	0.0765	0	0	0.6851	0.3221	0	0.2989	0	0	0	0	0.1591	0	0	1.2437	0.3029	0	0
Justicia leptostachya	0.2765	0.0747	0.0991	0.194	0.2285	0	0.2342	0.9115	0.6892	0.6197	0	0.3691	0.1623	0.1978	0.1747	0.2944	0.134	0.1399	0.0718	0.1996	0.2482	0.0544	0	0	0	0.0519	0.015	0	0	0.0909	0.0358	0.0466	0.3136	0	0	0	0	0	0	0	0.1661	0	0.1197	0.0946	0.2446	0.2483	0.341	0.261	0
Justicia flava	0.25	0.0744	0.0336	0.2902	0.2344	0	0.1911	0.2635	0.4327	0.1214	0.0918	0.3322	0.447	0.0726	0.1328	0.4933	0.1493	0.116	0.1394	0.1674	0.3869	0.0716	0	0	0	0.04	0	0	0	0.0597	0.0131	0.0314	0	0	0.3425	0	0	0	0	0	0.3398	0.308	0.1054	0.07	0.2154	0.2114	0.2583	0.5238	0
Peristrophe japonica	0.2756	0.0667	0.0746	0.1923	0.1769	0	0.192	0.2536	0.3117	0.2429	0.1118	0.3463	0.2347	0.0726	0.1805	0.5099	0.3018	0.0824	0.1588	0.2523	1.1907	0.0405	0	0	0	0.0483	0	0	0	0.0411	0.0131	0.0151	0.3136	0	0	0	0	0	0	0	0	0	0.0688	0.1123	0.3246	0.127	0.3337	0.5282	0
[truncated: 12 more columns]
